1 **Gene- and pathway-based association tests for multiple**  
2 **traits with GWAS summary statistics**

3 IL-YOUP KWAK<sup>1</sup>, WEI PAN<sup>1</sup>

4 <sup>1</sup>*Division of Biostatistics, University of Minnesota, Minneapolis, MN 55455, USA*

5 April 27, 2016

6 Correspondence author: Wei Pan

7 Telephone: (612) 626-2705

8 Fax: (612) 626-0660

9 Email: [weip@biostat.umn.edu](mailto:weip@biostat.umn.edu)

10 Address: Division of Biostatistics, MMC 303,  
11 School of Public Health, University of Minnesota,  
12 Minneapolis, Minnesota 55455-0392, U.S.A.

## 14 Abstract

15 To identify novel genetic variants associated with complex traits and to shed new insights  
16 on underlying biology, in addition to the most popular single SNP-single trait association  
17 analysis, it would be useful to explore multiple correlated (intermediate) traits at the gene-  
18 or pathway-level by mining existing single GWAS or meta-analyzed GWAS data. For this  
19 purpose, we present an adaptive gene-based test and a pathway-based test for association  
20 analysis of multiple traits with GWAS summary statistics. The proposed tests are adaptive at  
21 both the SNP- and trait-levels; that is, they account for possibly varying association patterns  
22 (e.g. signal sparsity levels) across SNPs and traits, thus maintaining high power across a wide  
23 range of situations. Furthermore, the proposed methods are general: they can be applied  
24 to mixed types of traits, and to Z-statistics or p-values as summary statistics obtained from  
25 either a single GWAS or a meta-analysis of multiple GWAS. Our numerical studies with  
26 simulated and real data demonstrated the promising performance of the proposed methods.

27 The methods are implemented in R package aSPU, freely and publicly available on CRAN  
28 at: <https://cran.r-project.org/web/packages/aSPU/>.

29 **Keywords:** adaptive association test; aSPU; endophenotypes; gene-level analysis; path-  
30 way analysis.

## 31 1 Introduction

32 In spite of the success of genome-wide association studies (GWAS) in identifying thousands  
33 of reproducible associations between single nucleotide polymorphism (SNPs) and complex  
34 diseases/traits, in general the identified genetic variants can explain only a small proportion  
35 of heritability (Manolio *et al.* 2009). A main reason is due to small effect sizes of genetic  
36 variants, raising both challenges and opportunities in developing more powerful analysis  
37 strategies. Among others, endeavors in the following three directions have been undertaken.  
38 First, due to polygenic effects (with small effect sizes) on complex traits, instead of the  
39 popular single SNP-single trait analysis, it may be more powerful to conduct gene- and  
40 pathway-level association tests (Lin and Tang, 2011; Wu *et al.* 2010; Pan *et al.* 2014; Li, *et*  
41 *al.* 2011; Gui *et al.* 2011; Li *et al.* 2012; Pan *et al.* 2015). However, most of the existing  
42 association tests are based on the use of individual-level genotypic and phenotypic data, while  
43 quite often only summary statistics for single SNPs are available. Thus, some association  
44 tests for a single trait but applicable to GWAS summary statistics have appeared, including  
45 GATES (Li *et al.* 2011), GATES-Simes (Gui *et al.* 2011), HYST (Li *et al.* 2012), and  
46 aSPUs and aSPUsPath (Kwak and Pan 2015). Second, while many GWAS have collected  
47 multiple (intermediate) traits, due to pleiotropic effects, multiple correlated (intermediate)  
48 traits, e.g. neuroimaging endophenotypes (Shen *et al.* 2010; Zhang *et al.* 2014), can be  
49 used to boost power and illuminate on underlying biological mechanisms as compared to  
50 popular disease-based single trait analyses; see a review by Yang and Wang (2013). Most  
51 of the existing association tests for multiple traits are based on individual-level data, (Basu  
52 *et al.* 2013; Tang and Ferreira 2012; Yang *et al.* 2010; Zhang *et al.* 2014; Wang *et al.* 2015;  
53 Fan *et al.* 2015, 2016) with only few exceptions such as MGAS (Sluis *et al.* 2015) and  
54 metaCCA (Cichonska *et al.* 2016). Third, to increase the sample size, large consortia are  
55 being formed, aiming for meta analysis of multiple GWAS, for which often only summary  
56 statistics for single SNP-single trait associations, rather than individual-level genotypic and  
57 phenotypic data, are available. Hence it is necessary to develop methods that are applicable

58 to only summary statistics. Motivated by the above three considerations, here we present  
59 such tests.

60 To our knowledge, there are only two existing tests that are for gene- or pathway-based  
61 analysis of multiple traits and applicable to summary statistics. MGAS (Sluis *et al.* 2015)  
62 uses an extended Simes procedure and behaves like a univariate minimum p-value approach,  
63 while metaCCA (Cichonska *et al.* 2016) is based on canonical correlation analysis (CCA) of  
64 multiple traits and multiple SNPs, which is related to MANOVA and GEE-score test (Zhang  
65 *et al.* 2014; Kim *et al.* 2016); the two tests may lose power in some situations with multiple  
66 but relatively sparse and weak association signals between the traits and SNPs (Pan *et al.*  
67 2014; Zhang *et al.* 2014). Accordingly, it would be useful to extend adaptive tests for multiple  
68 trait-single SNP (Kim *et al.* 2015) or for single trait-multiple SNP associations (Kwak and  
69 Pan, 2015) with summary statistics, or for multiple trait-multiple SNP associations with  
70 individual-level data (Kim *et al.* 2016), to the current case of multiple trait-multiple SNP  
71 associations with only GWAS summary statistics, which is the aim here. In addition, we  
72 propose a novel Monte Carlo simulation method based on a matrix normal distribution  
73 to estimate the p-values for our proposed tests, which is well justified by known asymptotic  
74 theory that is suitable for large GWAS. In our proposed approach, we use a reference panel to  
75 estimate linkage disequilibrium (LD) among physically nearby SNPs; in contrast, metaCCA  
76 uses a similar method to estimate a joint covariance matrix for both the multiple traits and  
77 multiple SNPs, possibly explaining why it requires a large sample size of the reference panel  
78 to perform well, as to be confirmed in our later simulations. We also note that in MGAS,  
79 instead of individual-level genotypic data in a reference panel, p-values as summary statistics  
80 are used to empirically estimate LD among SNPs, which may lead to non-positive definite  
81 correlation matrices as numerically shown in Kwak and Pan (2016).

82 Finally we note that our proposed methods are general with a wide range of applications.  
83 For example, the multiple traits can be mixed types: some may be quantitative while others  
84 binary; the summary statistics for single SNP-single trait associations, as either Z-statistics

85 or p-values, can be obtained from either a single GWAS or a meta-analysis of multiple GWAS  
86 (with any valid test being applied). It is noteworthy to point out that the current version  
87 of metaCCA requires an equal sample size for all SNP-trait pairs, which is too restrictive  
88 for meta-analyzed GWAS. For example, the sample sizes for the SNP-trait summary statis-  
89 tics in a real dataset to be analyzed varied dramatically, rendering the non-applicability of  
90 metaCCA.

91 We will validate the proposed methods using the Welcome Trust Case Control Con-  
92 sortium (WTCCC) GWAS data (WTCCC 2007), then illustrate their applications to a  
93 meta-analyzed dataset from the Genetic Investigation of ANthropometric Traits (GIANT)  
94 consortium (Randall *et al.* 2013). We will compare our methods with MGAS and metaCCA,  
95 demonstrating the promising performance and advantages of our methods.

## 96 2 Methods

### 97 2.1 Notation

98 Suppose there are  $d$  SNPs (e.g. in a gene for gene-based testing) with additive genotype  
99 scores  $\mathbf{G} = (G_1, \dots, G_d)'$ , where  $G_j$  is the number of minor alleles of the  $j$ th SNP; there are  
100  $m > 1$  quantitative or binary phenotypes  $Y = (Y_1, \dots, Y_m)'$ ; let  $\mathbf{C} = (C_1, \dots, C_l)'$  denote a  
101 set of covariates. We first consider one phenotype  $Y_h$  by applying a generalized linear model:

$$g[E(Y_h)] = \beta_{h0} + \sum_{j=1}^d \mathbf{G}_j \beta_{hj} + \alpha' \mathbf{C},$$

102 where  $g(\cdot)$  is a canonical link function (i.e. the identity function for a quantitative trait,  
103 or a logit function for a binary trait). We are interested in testing  $H_0 : \beta_{hj} = 0$  for all  
104  $h = 1, \dots, m$  and  $j = 1, \dots, d$ .

105 For a given dataset  $\{(Y_{ih}, \mathbf{G}_i, \mathbf{C}_i) : i = 1, \dots, n\}$  with  $n$  subjects, the score vector  $\mathbf{U}_h =$   
106  $(U_{h1}, \dots, U_{hd})'$  for  $\beta_h$  is

$$\mathbf{U}_h = \sum_{i=1}^n (Y_{ih} - \hat{\mu}_{0,ih}) \mathbf{G}_i,$$

107 where  $\hat{\mu}_{0h,i} = \hat{E}(Y_{ih}|H_0) = g^{-1}(\hat{\beta}_{0h} + \hat{\alpha}'\mathbf{C}_i)$  is the estimated mean of  $Y_{ih}$  in the null model  
 108 (under  $H_0$ ).

109 Kim *et al.* (2016) constructed an adaptive test for multi-trait and multi-SNP association  
 110 using the score vector. However, in the current context without individual-level data, we  
 111 cannot directly calculate  $U_{hj}$ 's as given in the formula.

112 Here we assume that we only have summary statistics, say an  $m \times d$  matrix of  $\mathbf{Z}$  scores,  
 113  $\mathbf{Z}$ . Each element  $Z_{hj}$ , from the  $i$ th row and  $j$ th column of  $\mathbf{Z}$ , represents a  $Z$  score for testing  
 114 association between the  $h$ th phenotype and the  $j$ th SNP. A  $Z$  score is (asymptotically) a  
 115 weighted version of an element in the score vector:  $Z_{hj} = \hat{\beta}_{hj}/se(\hat{\beta}_{hj}) \approx U_{hj}/se(U_{hj})$ ; the  
 116 approximation is based on the asymptotic equivalence between the Wald test and the Score  
 117 test. Taking the  $Z$  scores in place of the score vector has been proposed to test for multitrait–  
 118 single SNP associations (Kim *et al.* 2015) and single trait–multiple SNP associations (Kwak  
 119 and Pan 2015).

## 120 2.2 Gene-based tests

121 We extend the gene-based tests based on individual-level data (Kim *et al.* 2016) to those  
 122 based on summary statistics. Specifically, we define a test statistic for single trait-multiple  
 123 SNP association and that for multiple trait–multiple SNP association as

$$\text{SPUs}(\gamma_1; \mathbf{Z}_{(h)}) = \|\mathbf{Z}_{(h)}\|_{\gamma_1} = \left( \sum_{j=1}^d Z_{hj}^{\gamma_1} \right)^{1/\gamma_1},$$

$$\text{MTSPUsSet}(\gamma_1, \gamma_2; \mathbf{Z}) = \sum_{h=1}^m (\text{SPUs}(\gamma_1; \mathbf{Z}_{(h)}))^{\gamma_2}.$$

124 where  $\mathbf{Z}_{(h)}$  represents the  $h$ th row vector of matrix  $\mathbf{Z}$ ; i.e. the  $Z$  scores for the  $h$ th trait.  
 125 Two scalars  $\gamma_1 \geq 1$  and  $\gamma_2 \geq 1$  controls the extents of weighting on the SNPs and traits

126 respectively. For example, a larger  $\gamma_1$  (or  $\gamma_2$ ) is expected to yield higher power if there are  
127 a smaller number of the SNPs (or traits) with truly non-zero associations (i.e. with the  
128 corresponding  $\beta_{hj} \neq 0$ ). As discussed in more details in Kim *et al.* (2016),  $\text{MTSPUsSet}(1, 1)$   
129 is like a burden test (Shen *et al.* 2010), while  $\text{MTSPUsSet}(\gamma_1, \gamma_2)$  for large values of  $\gamma_1$  and  
130  $\gamma_2$  is effectively equivalent to a univariate minimum p-value test on all single SNP-single  
131 trait pairs;  $\text{MTSPUsSet}(2, 2)$  is closely related to a variance-component score test in kernel  
132 machine regression (Maity *et al.* 2012) and nonparametric MANOVA or distance-based  
133 regression (McArdle and Anderson 2001; Wessel and Schork 2006; Schaid 2005).

134 Since the optimal values of  $(\gamma_1, \gamma_2)$  are unknown, we propose an adaptive test to data-  
135 adaptively choose  $(\gamma_1, \gamma_2)$ :

$$\text{MTaSPUsSet}(\mathbf{Z}) = \min_{\gamma_1 \in \Gamma_1, \gamma_2 \in \Gamma_2} p_{(\gamma_1, \gamma_2, \mathbf{Z})},$$

136 where  $p_{(\gamma_1, \gamma_2, \mathbf{Z})}$  is the p-value for  $\text{MTSPUsSet}(\gamma_1, \gamma_2, \mathbf{Z})$ , and by default we use  $\Gamma_1 = \{1, 2, 4, 8\}$   
137 and  $\Gamma_2 = \{1, 2, 4, 8\}$ .

138 A main innovation here is to use a matrix normal distribution (Gupta and Nagar 1999;  
139 Zhou 2014) to obtain p-values based on the known asymptotic normal distribution of the  $\mathbf{Z}$   
140 scores under  $H_0$ . Specifically, denote  $\mathbf{Z}_{(i)}$  as the  $i$ th row vector, and  $\mathbf{Z}_j$  as the  $j$ th column  
141 vector (i.e. the  $\mathbf{Z}$  scores for  $j$ th SNP) of  $\mathbf{Z}$ . If the sample size is large (with relatively small  
142 numbers of traits and SNPs), by the standard asymptotics for the  $\mathbf{Z}$  scores, it is reasonable  
143 to assume that the null distribution of  $\mathbf{Z}$  is a matrix normal distribution:

$$\mathbf{Z} \sim MN_{m \times d}(\mathbf{0}_{m \times d}, \mathbf{P}, \mathbf{R}),$$

144 where  $\mathbf{0}_{m \times d}$  is the  $m \times d$  matrix with 0's. It is equivalent to saying that

$$\text{vec}(\mathbf{Z}) \sim N_{m*d}(\mathbf{0}_{m*d}, \mathbf{R} \otimes \mathbf{P}), \quad (1)$$

145 where  $\text{vec}(\mathbf{Z})$  is formed by stacking the columns of  $\mathbf{Z}$ ,  $\otimes$  is the Kronecker product, and  $\mathbf{0}_{m*d}$   
146 is a 0 vector of length  $m * d$ .

147 From equation (1), We see that  $\mathbf{Z}_i/\sqrt{R_{ii}}$  follows a normal distribution with mean 0 and  
148 covariance matrix  $\mathbf{P}$ , and that  $\mathbf{Z}_{(i)}/\sqrt{P_{ii}}$  follows a normal distribution with mean 0 and  
149 covariance matrix  $\mathbf{R}$  (Zhou, 2014). Since  $\mathbf{P}$  and  $\mathbf{R}$  are correlation matrices with  $R_{ii} = P_{ii} =$   
150 1, we obtain

$$\mathbf{Z}_i \sim N_m(\mathbf{0}_m, \mathbf{P}) \text{ and } \mathbf{Z}_{(i)} \sim N_d(\mathbf{0}_d, \mathbf{R}).$$

151 Following Kim *et al.* (2015), we propose excluding the SNPs with small p-values (e.g.  $< 0.05$ )  
152 and using a large subset of the remaining null SNPs to estimate  $\mathbf{P}$  with the sample correlation  
153 matrix of the Z scores. For  $\mathbf{R}$ , as shown by Kwak and Pan (2015) and others, it can be  
154 approximated by the sample correlation matrix of the SNPs using a reference panel similar  
155 to the study population. For example, we used 1000G Phase I version 3 Shapeit2 Reference  
156 data downloaded from the KGG software website (Li *et al.* 2012); it contains about 81.2  
157 million polymorphic markers on 2,504 samples released in September 2014. By default, we  
158 used 379 CEU (Utah Residents with Northern and Western Ancestry) samples.

Finally we note that, based on the asymptotic null distribution of  $\text{vec}(\mathbf{Z})$  in (1), we can  
construct a score test (if  $\mathbf{Z}$  is obtained by the univariate score test or its asymptotically  
equivalent tests like the Wald test):

$$T_{\text{Sco}} = \text{vec}(\mathbf{Z})'(\mathbf{R} \otimes \mathbf{P})^{-1}\text{vec}(\mathbf{Z}),$$

159 which has an asymptotic  $\chi_d^2$  with degrees of freedom  $d = \text{rank}(\mathbf{R} \otimes \mathbf{P})$ ; if  $\mathbf{R} \otimes \mathbf{P}$  is not of  
160 full rank, a generalized inverse is used in  $T_{\text{Sco}}$ .

As discussed in Zhang *et al.* (2014) and Kim *et al.* (2016), the score test is similar to  
CCA and MANOVA, hence we expect that  $T_{\text{Sco}}$  will perform similarly to metaCCA, as to  
be confirmed. Furthermore, the score test behaves differently from the aSPU test; neither  
can dominate the other with higher power in all applications. Hence, it might be useful to



combine the two tests as

$$T_{\text{MTaSPUsSet.Sco}} = \min(p_{\text{aSPU}}, p_{\text{Sco}}),$$

161 where  $p_{\text{aSPU}}$  and  $p_{\text{Sco}}$  are the p-values of the MTaSPUsSet and  $T_{\text{Sco}}$  respectively; as to be  
 162 shown, the p-values of all the tests could be obtained simultaneously in a single layer of  
 163 Monte Carlo simulations.

### 164 2.3 Pathway-based tests

165 We extend the pathway-based multi-trait association tests of Kim *et al.* (2016) to the case  
 166 with only GWAS summary statistics. Given a pathway  $S$  with  $|S|$  genes, we partition the  
 167 Z score matrix as  $\mathbf{Z} = (\mathbf{Z}'_{(1)}, \dots, \mathbf{Z}'_{(m)})'$  with  $\mathbf{Z}_{(i)}$  as the  $i$ th row vector (i.e. Z scores for the  
 168  $i$ th trait).  $\mathbf{Z}_{(i)}$  is further partitioned at the gene level to  $\mathbf{Z}_{(i)} = (\mathbf{Z}'_{(i1)}, \mathbf{Z}'_{(i2)}, \dots, \mathbf{Z}'_{(i|S|)})'$ , and  
 169 at the SNP level to  $(\mathbf{Z}_{(ig)} = (Z_{(ig)1}, Z_{(ig)2}, \dots, Z_{(ig)d_g}))$  (for the  $d_g$  SNPs in gene  $g$ ).

170 We define the gene- and pathway-based tests for a single trait and then for multiple traits

171 as

$$\begin{aligned} \text{SPUs}(\gamma_1; \mathbf{Z}_{(ig)}) &= \|\mathbf{Z}_{(ig)}\|_{\gamma_1} = \left( \sum_{j=1}^{d_g} Z_{(ig)j}^{\gamma_1} / d_g \right)^{1/\gamma_1}, \\ \text{SPUsPath}(\gamma_1, \gamma_2; \mathbf{Z}_{(i)}, S) &= \left( \sum_{g \in S} \text{SPUs}(\gamma_1; \mathbf{Z}_{(ig)})^{\gamma_2} / |S| \right)^{1/\gamma_2}, \\ \text{MTSPUsPath}(\gamma_1, \gamma_2, \gamma_3; \mathbf{Z}, S) &= \sum_{i=1}^m \text{SPUsPath}(\gamma_1, \gamma_2; \mathbf{Z}_{(i)}, S)^{\gamma_3}, \end{aligned}$$

172 where the three integers  $\gamma_1 \geq 1$ ,  $\gamma_2 \geq 1$  and  $\gamma_3 \geq 1$  are used to adaptively weight the SNPs,  
 173 genes and traits respectively. For example, a larger  $\gamma_1$  (or  $\gamma_2$ , or  $\gamma_3$ ) is more effective when  
 174 there are a smaller number of truly associated SNPs (or genes, or traits).

175 To adaptively choose  $(\gamma_1, \gamma_2, \gamma_3)$ , we propose a pathway-based adaptive test as

$$\text{MTaSPUsPath}(\mathbf{Z}, S) = \min_{\gamma_1 \in \Gamma_1, \gamma_2 \in \Gamma_2, \gamma_3 \in \Gamma_3} P_{(\gamma_1, \gamma_2, \gamma_3; \mathbf{Z}, S)},$$

176 where  $p_{(\gamma_1, \gamma_2, \gamma_3; \mathbf{Z}, S)}$  is the p-value of  $\text{MTSPUsPath}(\gamma_1, \gamma_2, \gamma_3; \mathbf{Z}, S)$ , and by default we use  
 177  $\Gamma_1 = \{1, 2, 4, 8\}$ ,  $\Gamma_2 = \{1, 2, 4, 8\}$  and  $\Gamma_3 = \{1, 2, 4, 8\}$ .

## 178 2.4 P-value calculations

179 Monte Carlo simulations are used to obtain the p-values for all the tests, including MTaS-  
 180 PUsSet or MTaSPUsSetPath, in a single layer of simulations. Briefly, after estimating  $\mathbf{P}$  and  
 181  $\mathbf{R}$ , first we simulate null scores  $\mathbf{Z}^{(b)} \sim MN_{m \times d}(0_{m \times d}, \mathbf{P}, \mathbf{R})$  for  $b = 1, \dots, B$ . Then we use  
 182 the null scores to calculate the null test statistics, from which the p-values can be calculated  
 183 (Kwak and Pan 2016). A larger  $B$  is needed to estimate a smaller p-value.

184 We generate a matrix normal variate  $\mathbf{Z}^{(b)}$  in the following way (Zhou 2014). We first  
 185 generate an  $n \times d$  matrix  $\mathbf{L}$  with each element independently from a standard univariate  
 186 normal distribution with mean 0 and variance 1; that is,  $\mathbf{L} \sim MN_{m \times d}(0_{m \times d}, I_m, I_d)$ . Then  
 187 we obtain  $\mathbf{Z}^{(b)} = \mathbf{D}\mathbf{L}\mathbf{E}'$ , where  $\mathbf{D}$  and  $\mathbf{E}$  are Cholesky decompositions of  $\mathbf{P}$  and  $\mathbf{R}$  with  
 188  $\mathbf{P} = \mathbf{D}\mathbf{D}'$  and  $\mathbf{R} = \mathbf{E}\mathbf{E}'$ .

189 Specifically, for MTaSPUsSet,

- 190 • Step 1. Generate independent  $\mathbf{Z}^{(b)} \sim MN_{m \times d}(0_{m \times d}, \mathbf{P}, \mathbf{R})$  for  $b = 1, \dots, B$ ;
- 191 • Step 2. Calculate the null test statistics  $\text{MTSPUsSet}(\gamma_1, \gamma_2, \mathbf{Z}^{(b)})$ ;
- Step 3. The p-value for  $\text{MTSPUsSet}(\gamma_1, \gamma_2; \mathbf{Z})$  is

$$p_{\gamma_1, \gamma_2} = \left[ \sum_{b=1}^B I(|\text{MTSPUsSet}(\gamma_1, \gamma_2; \mathbf{Z}^{(b)})| \geq |\text{MTSPUsSet}(\gamma_1, \gamma_2; \mathbf{Z})|) + 1 \right] / (B + 1),$$

and that for  $\text{MTSPUsSet}(\gamma_1, \gamma_2; \mathbf{Z}^{(b)})$  is

$$p_{\gamma_1, \gamma_2}^{(b)} = \left[ \sum_{b_1 \neq b} I(|\text{MTSPUsSet}(\gamma_1, \gamma_2; \mathbf{Z}^{(b_1)})| \geq |\text{MTSPUsSet}(\gamma_1, \gamma_2; \mathbf{Z}^{(b)})|) + 1 \right] / B;$$

- Step 4. Calculate the null and observed test statistics

$$\text{MTaSPUsSet}(\mathbf{Z}^{(b)}) = \min_{\gamma_1 \in \Gamma_1, \gamma_2 \in \Gamma_2} p_{\gamma_1, \gamma_2}^{(b)},$$

$$\text{MTaSPUsSet}(\mathbf{Z}) = \min_{\gamma_1 \in \Gamma_1, \gamma_2 \in \Gamma_2} p_{\gamma_1, \gamma_2};$$

- Step 5. Finally the p-value for the MTaSPUsSet test is

$$p_{\text{MTaSPUsSet}} = \left[ \sum_{b=1}^B I(\text{MTaSPUsSet}(\mathbf{Z}^{(b)}) \leq \text{MTaSPUsSet}(\mathbf{Z})) + 1 \right] / (B + 1).$$

192 A similar procedure is used to obtain the p-values for MTSPUsPath and MTaSPUsPath.

193 When only p-values for single SNP-single trait associations, instead of Z statistics, are  
194 available as summary statistics, we use  $|Z| = \Phi^{-1}(1 - P/2)$ , where  $\Phi$  is the cumulative  
195 distribution function of the standard univariate normal distribution; we replace all Z's with  
196  $|Z|$ 's to calculate the test statistics.

## 197 **3 Results**

### 198 **3.1 Simulations**

199 To demonstrate the validity and performance of our proposed methods, we designed a  
200 “Control-Control” experiment using the Wellcome Trust Case Control Consortium (WTCCC)  
201 GWAS data for Crohn’s disease (CD) (Consortium 2007; Kwak and Pan 2016). The WTCCC  
202 GWAS dataset contains about 3,000 controls with a total of 500,568 SNPs. Following the  
203 WTCCC’s quality control (QC) recommendations, we removed subjects and SNPs that did

204 not pass the QC criteria, resulting in 469,612 SNPs in 2,938 control subjects. We further  
205 removed SNPs with  $MAF < 5\%$  since we had only 379 samples in our reference panel to infer  
206 the LD structure for a set of SNPs. We considered 4,572 unique genes in 186 KEGG path-  
207 ways to check type 1 error rates of our gene-based test. A total of 64,557 SNPs were mapped  
208 to these genes.

209 We simulated multiple traits using a multivariate normal distribution with mean 0 and  
210 correlation matrix in Equation (3) of Figure S1, which was estimated based on the GIANT  
211 data for women. We generated a set of six traits for each of the 2938 control subjects.  
212 Then we calculated the univariate Z scores for all 64,557-6 SNP-trait pairs. A Monte Carlo  
213 simulation size of  $B = 10^5$  was used to calculate the p-values.

214 For each gene (or pathway),  $\mathbf{R}$  was estimated from the 1000 Genome Project CEU  
215 samples. To estimate  $\mathbf{P}$ , we excluded the SNPs with p-values  $< 0.05$  and used the remaining  
216 48,669 SNPs. Equation (1) of Figure S1 is the estimate for  $\mathbf{P}$ . This estimate is close to  
217 the true value shown in Equation (3) of Figure S1,  $\mathbf{P}_w$ . We pruned SNPs in high LD by  
218 removing any SNP if it was correlated with another SNP with an absolute value of Pearson's  
219 correlation coefficient larger than 0.95.

## 220 **3.2 Gene-based tests**

221 We first investigated the effects of the choice of the reference panel on estimating LD among  
222 SNPs, i.e.  $\mathbf{R}$  for each gene. We considered three scenarios : 1) using the whole 2938 WTCCC  
223 controls as the reference panel as an ideal case; 2) using only a random set of 100 WTCCC  
224 control samples as the reference panel to see whether a sample size as low as 100, close to  
225 that of many published reference panels, was sufficient to obtain accurate estimates; 3) using  
226 the 1000 Genomes Project CEU samples with 379 individuals as the reference panel, a more  
227 realistic scenario without individual level data.

228 Figure S2 shows the QQ plots of the p-values of the MTaSPUsSet test based on each  
229 of the three ways to estimate the SNP correlation matrix. We can see that all three plots

230 looked reasonable with the estimated inflation factor  $\lambda$ 's as 1.01, 0.99 and 0.99 respectively,  
231 all close to 1. It was confirmed that the type I error rates seemed to be well controlled in all  
232 cases.

233 Next we further compared the results as shown in Figure 4. By comparing the results  
234 between using the WTCCC whole control samples and using only 100 samples as reference  
235 panel, we conclude that taking only 100 samples from the original whole dataset seemed  
236 to perform well; the Pearson correlation ( $r$ ) between the two was 0.99. The top right and  
237 bottom left panels compare the results between using the WTCCC whole data, WTCCC  
238 100 samples and 1000 Genome Project CEU samples as the reference panel; again they  
239 showed high degrees of mutual agreement with a Pearson correlation coefficient as high as  
240 0.97 and 0.98 respectively. In the bottom right panel, we further compared the results of  
241 MTaSPUsSet with only summary statistics (using the 1000 Genome Project CEU samples as  
242 the reference panel) to a similar GEE-based adaptive test with individual-level data (Kim *et*  
243 *al.* 2016). Although the agreement was reasonably high with a Pearson correlation coefficient  
244 of 0.9, there were some differences, indicating that cautions are needed when using summary  
245 statistics.

246 We also tried metaCCA (Cichonska *et al.* 2016) and  $T_{\text{Sco}}$  on the simulated data, and  
247 found that both might not work well when the sample size of the reference panel was small.  
248 We used 1) the whole 2938 WTCCC controls as an ideal case; 2) 100-2000 samples from  
249 the WTCCC control data; 3) using the 1000 Genome Project CEU samples, respectively,  
250 as the reference panel. We used “metaCcaGp” function in the R version of metaCCA at:  
251 <https://bioconductor.org/packages/devel/bioc/html/metaCCA.html>. Figures S3 and  
252 S4 show the QQ plots for each scenario. In particular, it showed that even a sample size  
253 of 500 drawn from the WTCCC control data or of 379 for the 1000 Genome Project CEU  
254 samples might not be large enough; because of this reason, we would not apply the tests  
255 (and thus MTaSPUsSet.Sco either) to the real data.

256 Importantly, it was confirmed that metaCCA and  $T_{\text{Sco}}$  gave almost the same p-values, as

257 shown in Figure S5

### 258 **3.3 Pathway-based tests**

259 For evaluations, we designed a control-control experiment using the WTCCC CD data. We  
260 randomly chosen 3 to 15 genes from the WTCCC data to form a pathway. We applied  
261 the MTaSPUsPath test to each of 319 pathways. Simulations were conducted with different  
262 reference panels used to estimate  $\mathbf{R}$ , similar to what was done for gene-based testing.

263 Figure S6 compares the results of MTaSPUsPath with various reference panels, and of  
264 a similar pathway-based adaptive test called GEE-aSPUPath based on individual-level data  
265 (Kim *et al.* 2016). Similar conclusions to those for the gene-based MTaSPUsSet test can be  
266 drawn.

### 267 **3.4 Analysis of GIANT data**

268 We applied the MTaSPUsSet test to the summary statistics for sex stratified anthropomet-  
269 rics data from The Genetic Investigation of ANthropometric Traits (GIANT) consortium  
270 (Randall *et al.* 2013). The data contain the p-values of 2.7 million SNPs with each of six  
271 anthropometric traits that are well established to represent the body size and shape: height,  
272 weight, BMI, waist circumference (WC), hip circumference (HIP), and waist-hip circumfer-  
273 ence ratio (WHR).

274 The original study was based on a single SNP–single trait association analysis (Randall  
275 *et al.* 2013). Instead, we applied two gene-based association tests on the six traits (height,  
276 weight, BMI, WC, HIP and WHR) for men and for women separately: our proposed MTaS-  
277 PUsSet and MGAS of Sluis *et al.* (2015). Since all study participants were of European  
278 ancestry, we used the 1000 Genome Project CEU samples as the reference panel for both  
279 methods.

280 First, for MTaSPUsSet, in total 2,722,976 SNPs were mapped to 17,562 genes (plus 2-kb  
281 upstream and 2-kb downstream regions). We set the genome-wide significance threshold at

282  $0.05/17562 = 2.85 \times 10^{-6}$  based on the Bonferroni correction. We pruned SNPs in high  
283 LD by removing any SNP if it was correlated with another SNP with an absolute value of  
284 Pearson’s correlation coefficient larger than 0.95. For each gene, the correlations among the  
285 SNPs,  $\mathbf{R}$ , were estimated from the 1000 Genome Project CEU samples. The correlations  
286 among the six traits were estimated based on 1,454,615 null SNPs with non-significant  $Z$   
287 scores for men and women respectively as shown in Figure S1.

288 A stage-wise simulation strategy was used to calculate the p-values for each gene. We  
289 started with the simulation number  $B = 10^4$ ; we sequentially increased  $B$  to  $10^5$ , then  $10^6$   
290 and finally  $10^7$  if a gene’s p-value was less than 0.003, 0.0003 and 0.00003 respectively.

291 The MTaSPUsSet test identified a total of 137 genes to be genome-wide significant for  
292 men or women: 81 for men, 125 for women and 69 for both. As a comparison, for single  
293 SNP–single trait analysis, we used a genome-wide significance threshold of  $5 \times 10^{-8}/6$  based  
294 on a Bonferroni adjustment for six traits, yielding in total 1298 significant SNPs (with 623  
295 SNPs mapped to 62 genes) for men, and 2072 significant SNPs (with 990 SNPs mapped  
296 to 97 genes) for women. Although there were many common genes (i.e. 53 and 85 for  
297 men and women) identified by both methods, the proposed MTaSPUsSet test identified  
298 more genes (Table S1). In particular, to demonstrate the sex differences of genetic effects,  
299 the new test pinpointed 12 and 56 significant genes uniquely and specifically for men and  
300 women respectively; in contrast, the popular and standard single SNP–single trait analysis  
301 identified 20 and 55 genes uniquely for men and women respectively. The smaller number of  
302 men-specific genes identified by the new test could be due to its higher power: it is reasonable  
303 to assume that some of the identified sex-specific genes are false positives due to inadequate  
304 power for either sex, though further validations are needed.

305 Next, we applied MGAS of Sluis *et al.* (2015) using “kcg” software. The same 2-kb  
306 upstream and 2-kb downstream regions were used in mapping the SNPs to each gene, and  
307 the same estimated trait correlation matrices were used. However, for unknown reasons,  
308 only in total 969,832 SNPs were mapped to 6,424 genes, compared to ours of mapping

309 2,722,976 SNPs to 17,562 genes. Accordingly, the genome-wide significance threshold was  
310 set at  $0.05/6424 = 7.78 \times 10^{-6}$  based on the Bonferroni correction. In total only 19 genes  
311 were identified by MGAS to be significant: 16 genes for women and 8 for men.

312 For a fair comparison between MTaSPUsSet and MGAS, we examined more closely the  
313 17,562 and 6,424 mapped genes for each method. There were 5197 shared genes commonly  
314 mapped by both methods; many of the 6,424 “kcg” genes starting with “LOC” and “LINC”  
315 were not in the MTaSPUsSet set of the 17,562 genes. We decided to apply both methods to  
316 the common set of the 5197 genes. The genome-wide significance level was set at  $0.05/5197$   
317 by the Bonferroni adjustment.

318 Figure 5 shows the Manhattan plots for men and women based on MGAS and MTaSPUs-  
319 Set respectively. Although there were some shared and general patterns between the results  
320 of the two methods, MTaSPUsSet identified a larger number of significant genes: a total of  
321 49 genes with 27 and 39 for men and women respectively. In contrast, MGAS identified only  
322 a total of 17 genes with 7 and 14 for men and women respectively. It might suggest that  
323 MTaSPUsSet was more powerful, though further validations are needed.

324 To further contrast the differences between the two tests, Table S2 lists the 17 signifi-  
325 cant genes identified by MGAS with the corresponding p-values from the two tests. Genes  
326 *LCORL*, *VTA1*, *BICD2*, *RASA2*, *GNA12*, *NCOA1*, *TNS1*, *CEP112*, *DNM3* and *RFWD2*  
327 were significant for women by both MGAS and MTaSPUsSet, and *LCORL*, *RASA2* and  
328 *NDUFS3* were significant for men by both tests, while *LCORL* and *RASA2* were significant  
329 for both men and women by both tests. Gene *LCORL* was known to be associated with  
330 anthropometric traits, including body height in African Americans (Carty *et al.* 2012), birth  
331 weight and adult height (Horikoshi *et al.* 2013); it is also a candidate gene for body weight  
332 in sheep (Al-Mamun *et al.* 2015) and body size in horse (Metzger *et al.* 2013).

333 Figure 6 shows the p-values of the univariate test on single trait-single SNP associations  
334 for some genes identified by MTaSPUsSet, along with the  $(\gamma_1, \gamma_2)$  values for the most signif-  
335 icant MTSPUsSet $(\gamma_1, \gamma_2)$  test for each gene. It can be seen that for genes *RPGRIP1L* and



336 *RPS10-NUDT3*, since there were many moderately significant univariate p-values (for uni-  
337 variate trait-SNP associations) with a dense association pattern, small values  $(\gamma_1, \gamma_2) = (1, 2)$   
338 or  $(2, 1)$  gave the most significant results. In contrast, for gene *DNM3* with a larger number  
339 of SNPs, the association pattern was more sparse with main associations between some SNPs  
340 and trait height, larger values of  $(\gamma_1, \gamma_2) = (4, 8)$  or  $(8, 8)$  gave the most significant result.  
341 On the other hand, for gene *ZCCHC2*, due to the two or three highly significant univariate  
342 p-values between one or two SNPs and two traits, weight and BMI, any value of  $(\gamma_1, \gamma_2)$   
343 would detect the overall association.

## 344 4 Discussion

345 We have presented new gene- and pathway-based adaptive association tests for multiple  
346 traits using only GWAS summary statistics. Our control-control experiments using the  
347 WTCCC genotype data with simulated multiple traits demonstrated that the type I error  
348 rates were well controlled. For the estimation of LD among SNPs (i.e. correlation matrix  
349  $\mathbf{R}$ ), the choice of a reference panel (with individual-level genotypic data) would be a key for  
350 the performance. In the WTCCC control-control experiments, we compared three reference  
351 panels based on either the whole or a small subset of the original WTCCC control data, and  
352 the 1000 Genome Project CEU samples (with 379 subjects). The p-values calculated from  
353 the three reference panels were in general similar, but not exactly the same; the Pearson  
354 correlation coefficient of the log(p-values) between any two reference panels was at least  
355 0.97, confirming that either the 1000 Genome Project CEU samples or a small subset of  
356 the control samples from the original population were sufficient for the WTCCC subject  
357 population.

358 We applied our gene-based MTaSPUsSet test to the meta-analyzed GIANT data. Since  
359 the participants in the GIANT data were of European and European American descent, the  
360 use of the 1000 Genome Project CEU panel was expected to be reasonable. The MTaSPUsSet

361 test identified a total of 137 significant genes: 81 for men, 125 for women and 69 for both.  
362 As a comparison, for single SNP–single trait analysis identified 117 genes : 62 for men, 97  
363 for women and 42 for both. MTaSPUsSet identified more genes. For more comparison,  
364 we also applied MGAS (Sluis *et al.* 2015) using the same reference panel, identifying only  
365 19 significant genes using “kkg” software with a smaller set of the genes being mapped.  
366 For a fair comparison, we applied both MTaSPUsSet and MGAS to a common set of 5197  
367 genes. MTaSPUsSet identified 27 and 39 significant genes for men and women respectively,  
368 compared to only 7 and 14 genes by MGAS, suggesting possible power gains by MTaSPUsSet.  
369 We also note that the other method metaCCA could not be applied to the GIANT data  
370 because it required a common sample size for all SNP-trait pairs, while the sample size for  
371 some SNPs ranged from around 200 to about 70,000 across the traits.

## 372 **Software**

373 The proposed methods are implemented in R package `aSPU`, which is unique with many  
374 functions for association testing on a single trait or multiple traits versus a single SNP or  
375 a gene or a pathway, based on either individual-level data or GWAS summary statistics.  
376 It is available at <https://github.com/ikwak2/aSPU>. A python version is also available at  
377 [https://github.com/ikwak2/aSPU\\_py](https://github.com/ikwak2/aSPU_py).

## 378 **Acknowledgment**

379 Funding: This research was supported by NIH grants R01GM113250, R01HL105397 and  
380 R01HL116720, and by the Minnesota Supercomputing Institute.

## 381 References

- 382 Al-Mamun, HA., Kwan, P., Clark, SA., Ferdosi, MH., Tellam, R., Gondro, C. (2015)  
383 Genome-wide association study of body weight in Australian Merino sheep reveals an  
384 orthologous region on OAR6 to human and bovine genomic regions affecting height  
385 and weight. *Genet Sel Evol* **47**(1): 66.
- 386 Basu, S., Zhang, Y., Ray, D., Miller, MB., Iacono, WG., McGue, M. (2013). A rapid gene-  
387 based genome-wide association test with multivariate traits. *Hum Hered* **71**, 67–82.
- 388 Carty, CL., Johnson, NA., Hutter, CM., Reiner, AP., Peters, U., Tang, H., Kooperberg,  
389 C.(2012). Genome-wide association study of body height in African Americans: the  
390 Women’s Health Initiative SNP Health Association Resource (SHARe). *Hum Mol*  
391 *Genet* **21**(3), 711–720.
- 392 Cichonska, A., Rousu, J., Marttinen, P., Kangas, AJ., Soininen, P., Lehtimáki, T., Raitakari,  
393 OT., Järvelin, MR., Salomaa, V., Ala-Korpela, M., *et al.* (2016) metaCCA: Summary  
394 statistics-based multivariate meta-analysis of genome-wide association studies using  
395 canonical correlation analysis. *Bioinformatics* doi: 10.1093/bioinformatics/btw052.
- 396 Consortium, W. T. T. C. C. C., 2007 Genome-wide association study of 14,000 cases of  
397 seven common diseases and 3,000 shared controls. *Nature* **447**, 661-678
- 398 de Leeuw, CA., Mooij, JM., Heskes, T., Posthuma, D. (2015) Magma: Generalized gene-set  
399 analysis of gwas data. *PLOS Comput. Biol.* **11**(4), e1004219.
- 400 Fan RZ, Wang YF, Boehnke M, Chen W, Li Y, Ren HB, Lobach I, and Xiong MM. (2015)  
401 Gene level meta-analysis of quantitative traits by functional linear models. *Genetics*  
402 **200**, 1089-1104.
- 403 Fan RZ, Wang YF, Chiu CY, Chen W, Ren HB, Li Y, Boehnke M, Amos CI, Moore J,  
404 and Xiong MM. (2016) Meta-analysis of complex diseases at gene level by generalized

- 405 functional linear models. To appear in *Genetics*.
- 406 Gui, H., Li, M., Sham, P., Cherny, S. (2011) Comparisons of seven algorithms for pathway  
407 analysis using the wtccc crohns disease dataset. *BMC Res. Notes* **4**, 386.
- 408 Gupta, AK., Nagar, DK. (1999) Matrix Variate Distributions. *Chapman and Hall/CRC*.
- 409 Horikoshi, M., Yaghootkar, H., Mook-Kanamori, OD., Sovio, U., Taal, HR., Hennig, JB.,  
410 Bradfield, PJ., St. Pourcain, B., Evans, MD., Charoen, P. (2013) New loci associated  
411 with birth weight identify genetic links between intrauterine growth and adult height  
412 and metabolism. *Nat Genet.* **45**(1), 76-82.
- 413 Kim, J., Wozniak, JR., Mueller, BA., Shen, X., Pan, W. (2014) Comparison of statistical  
414 tests for group differences in brain functional networks. *NeuroImage* **101**, 681-694.
- 415 Kim J, Bai Y, Pan W (2015). An adaptive association test for multiple phenotypes with  
416 GWAS summary statistics. *Genet Epidemiol.*, **39**, 651-663.
- 417 Kim, J., Zhang, Y., Pan, W., for the Alzheimers Disease Neuroimaging Initiative (2016)  
418 Powerful and adaptive testing for multi-trait and multi-SNP associations with GWAS  
419 and sequencing data. *Genetics* DOI: 10.1534/genetics.115.186502
- 420 Kwak, I., Pan, W. (2015) Adaptive gene- and pathway-trait association testing with gwas  
421 summary statistics. *Bioinformatics*, doi: 10.1093/bioinformatics/btv719.
- 422 Li, M., Gui, H., Kwan, J., Sham, P. (2011). Gates: a rapid and powerful gene-based  
423 association test using extended simes procedure. *Am. J. Hum. Genet.* **88**(3), 283–  
424 293.
- 425 Li, M., Kwan, J., Sham, P. (2012) Hyst: a hybrid set-based test for genome-wide association  
426 studies, with application to protein-protein interaction-based association analysis. *Am.*  
427 *J. Hum. Genet.* **91**, 478–488.

- 428 Lin, D., Tang, Z. (2011) A general framework for detecting disease associations with rare  
429 variants in sequencing studies. *Am. J. Hum. Genet.* **89**, 354-367.
- 430 Maity, A., Sullivan, PF., Tzeng, JY. (2012) Multivariate phenotype association analysis by  
431 marker-set kernel machine regression. *Genet Epidemiol* **36**, 686-695.
- 432 Manolio, TA., Collins, FS., Cox, NJ., Goldstein, DB., Hindorff, L.A., Hunter, DJ., Mc-  
433 Carthy, MI., Ramos, EM., Cardon, LR., Chakravarti, A., et al. (2009) Finding the  
434 missing herita- bility of complex diseases. *Nature* **461**, 747-753.
- 435 McArdle, BH., Anderson, MJ. (2001) Fitting multivariate models to community data: A  
436 comment on distance-based redundancy analysis. *Ecology* **82**, 290-297.
- 437 Metzger, J., Schrimpf, R., Philipp, U., Distl, O. (2013) Expression levels of LCORL are  
438 associated with body size in horses. *PLoS One* **8**(2), e56497.
- 439 Morgenthaler, S., Thilly, W. (2007) A strategy to discover genes that carry multi-allelic or  
440 mono-allelic risk for common diseases: A cohort allelic sums test (cast). *Mutat. Res.*  
441 **615**, 28-56.
- 442 Pan, W., Kim, J., Zhang, Y., Shen, X., Wei, P. (2014) A powerful and adaptive association  
443 test for rare variants. *Genetics* **197**(4), 1081-1095.
- 444 Pan, W., Kwak, I., Wei, P. (2015) A powerful pathway-based adaptive test for genetic  
445 association with common or rare variants. *Am. J. Hum. Genet.* **97**(1), 86-98.
- 446 Randall, JC., Winkler, TW., Kutalik, Z., Berndt, SI., Jackson, AU., Monda, KL., Kilpeläinen,  
447 TO., Esko, T., Mägi, R., Li, S. *et al.* (2013) Sex-stratified genome-wide association  
448 studies including 270,000 individuals show sexual dimorphism in genetic loci for an-  
449 thropometric traits. *PLoS Genet* **9**, e1003500.
- 450 Schaid, DJ., McDonnell, SK., Hebring, SJ., Cunningham, JM., Thibodeau, SN. (2005)  
451 Nonparametric tests of association of multiple genes with human disease. *Am J Hum*

452 *Genet* **76**, 780-793.

453 Shen, L., Kim, S., Risachera, SL., Nho, K., Swaminathan, S., Westa, JD., Foroudd, T., et al.  
454 (2010) Whole genome association study of brain-wide imaging phenotypes for identify-  
455 ing quantitative trait loci in MCI and AD: A study of the ADNI cohort. *NeuroImage*  
456 **53**, 1051–1063.

457 Van der Sluis, S., Dolan, CV., Li, J., Song, Y., Sham, P., Posthuma, D., Li, MX. (2015)  
458 MGAS: a powerful tool for multivariate gene-based genome-wide association analysis.  
459 *Bioinformatics* **31**(7), 1007-1015.

460 Tang, CS., Ferreira, MAR. (2012) A gene-based test of association using canonical correla-  
461 tion analysis. *Bioinformatics* **28**(6), 845–850.

462 Wang YF, Liu AY, Mills JL, Boehnke M, Wilson AF, Bailey-Wilson JE, Xiong MM, Wu  
463 CO, and Fan RZ. (2015) Pleiotropy analysis of quantitative traits at gene level by  
464 multivariate functional linear models. *Genetic Epidemiology* **39**, 259-275.

465 Wessel, J., Schork, NJ. (2006) Generalized genomic distance-based regression methodology  
466 for multilocus association analysis. *Am J Hum Genet* **79**, 792–806.

467 Wu, MC., Kraft, P., Epstein, MP., Taylor, DM., Chanock, SJ., Hunter DJ., Lin, X. (2010)  
468 Powerful snp-set analysis for case-control genome-wide association studies. *Am. J.*  
469 *Hum. Genet* **86**, 929-942.

470 Zhou, S., (2014) Gemini: graph estimation with matrix variate normal instances. *Ann.*  
471 *Statist.* **42** (2), 532-562.

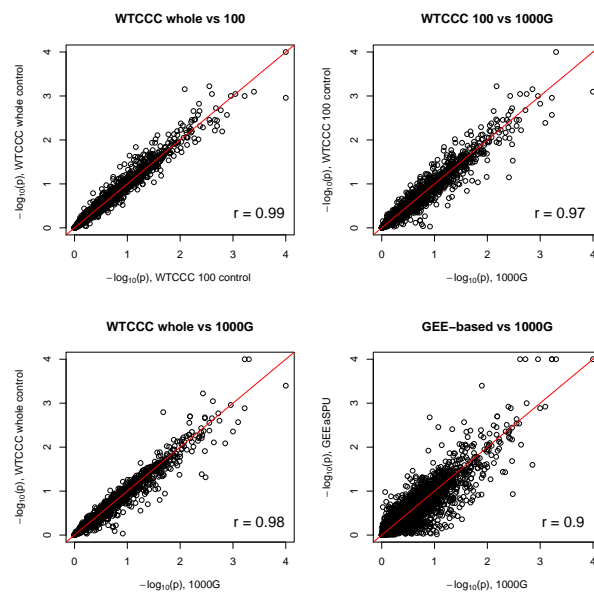

Figure 1: Comparison of the (log-transformed) p-values of MTaSPUsSet using various reference panels and that of the GEE-aSPU test using individual-level data.

Figure 2: Manhattan plots for the GIANT data using MGAS and MTaSPUsSet on 5197 genes for men and women respectively.

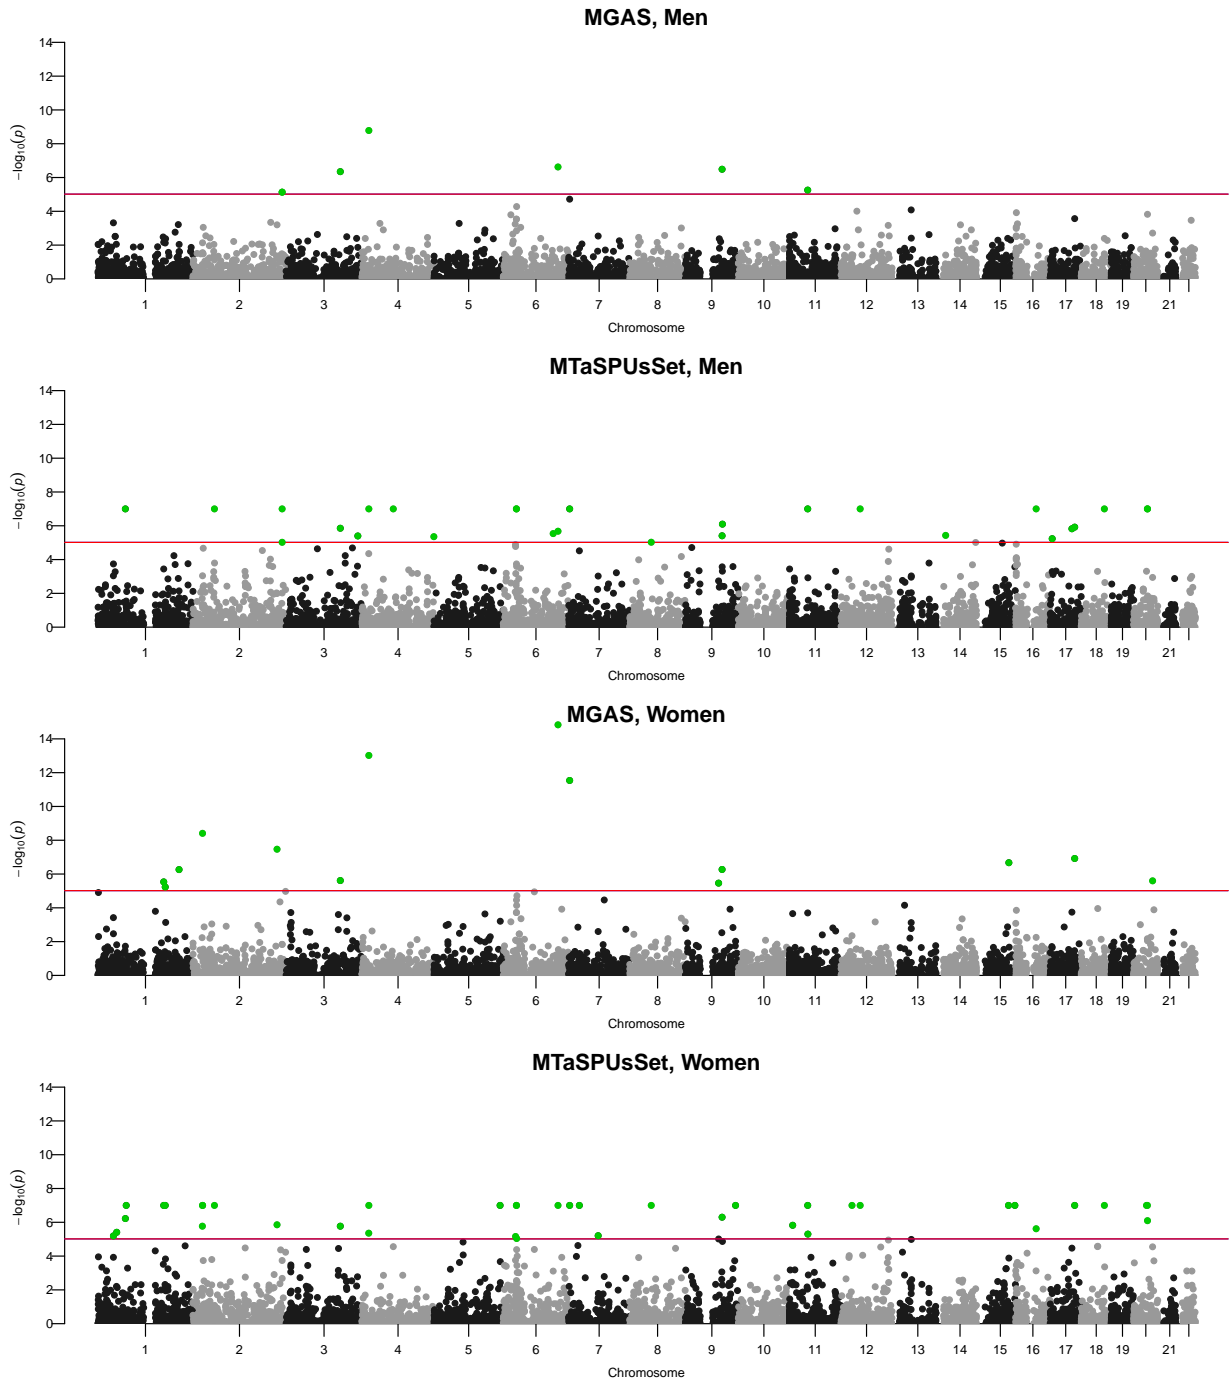



Figure 3: Log-transformed p-values of univariate SNP-trait associations for some genes identified by MTaSPUsSet. The most significant MTSPUsSet( $\gamma_1, \gamma_2$ ) test with the corresponding ( $\gamma_1, \gamma_2$ ) values were (2, 1) for gene *RPGRIP1L*, (1, 2) for *RPS10-NUDT3*, (4, 8) or (8, 8) for *DNM3* and any value for *ZCCHC2*.

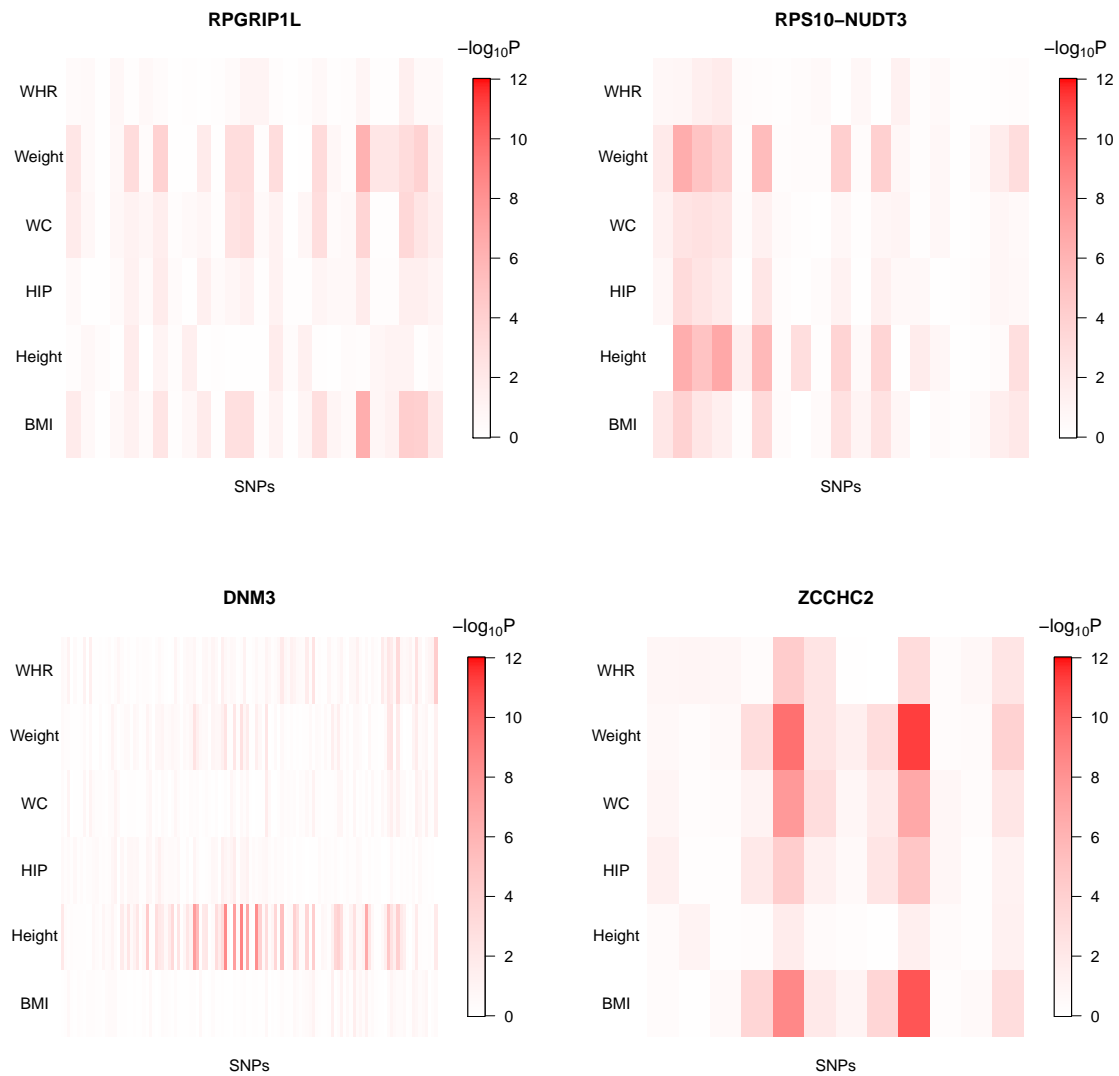

Source: https://www.biorxiv.org/content/10.1101/052068v1.full.pdf
